# Supplementary material for: A general, eco-friendly synthesis procedure of self-assembled ZnO-based materials with multifunctional properties
Source: Royal Society of Chemistry journal article supplement (doi:10.1039/c5dt00707k), 2015-01-01
Supplement: c5dt00707k1.pdf [file c5dt00707k1.pdf]

## A general, eco-friendly synthesis procedure of self-assembled ZnO-based materials with multifunctional properties

Alina Stan,<sup>a</sup> Cornel Munteanu,<sup>a</sup> Adina Magdalena Musuc,<sup>a</sup> Ruxandra Birjega,<sup>b</sup> Ramona Ene,<sup>a</sup> Adelina Ianculescu,<sup>c</sup> Iulia Raut,<sup>d</sup> Luiza Jecu,<sup>d</sup> Mihaela Badea Doni,<sup>d</sup> Elena Maria Anghel,<sup>a</sup> and Oana Carp<sup>\*,a</sup>

### Electronic supplementary information

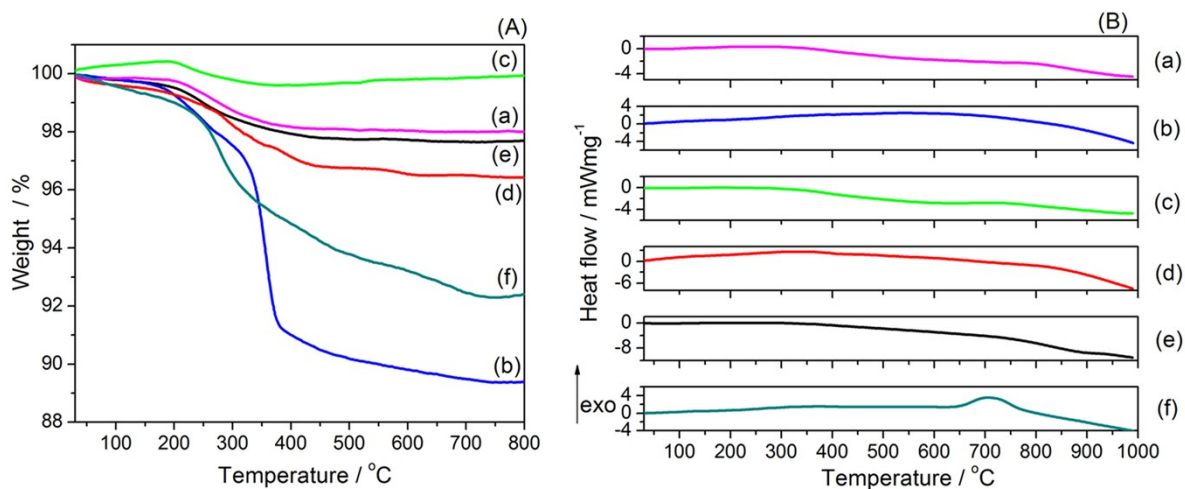

**Figure 1.** TG (A) and DSC (B) curves of (a) ZnO\_S, (b) ZnO\_MC, (c) ZnO\_G, (d) ZnO\_F, (e) ZnO\_D, (f) ZnO\_ST.

| Sample | <i>Pseudomonas aeruginosa</i>                                                       | <i>Bacillus subtilis</i>                                                             |
|--------|-------------------------------------------------------------------------------------|--------------------------------------------------------------------------------------|
| ZnO    | 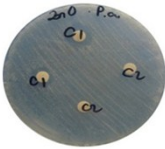   |    |
| ZnO_G  |    |    |
| ZnO_S  |    |    |
| ZnO_ST |    |    |
| ZnO_D  |   |   |
| ZnO_MC |  |  |
| ZnO_F  |  |  |

**Figure 2.** Petri plates assays of inhibitory effect of ZnO\_SAC composites against bacterial strains (72 hours).

**Experimental disc agar diffusion assay**

The bacterial strains inoculated on Luria Bertani medium were incubated for 48 hours at 37° C, till the optical density reached 0.140 at 590 nm (OD<sub>590</sub>) corresponding to 1.95 x 10<sup>8</sup> CFU/ml. (spectrophotometer BioMate). Subsequently, Petri plates with LB medium were inoculated with freshly prepared bacterial suspension, and sterile paper discs of 6 mm diameter placed on solid medium surface were impregnated with 25 µl of each ZnO\_SAC solutions. The plates containing bacterial strains and ZnO based composite were incubated at 25 – 27 °C, for 72 hours. The diameter of the inhibition zones were measured on two perpendicular directions. The experiments were performed in triplicate under the same conditions.

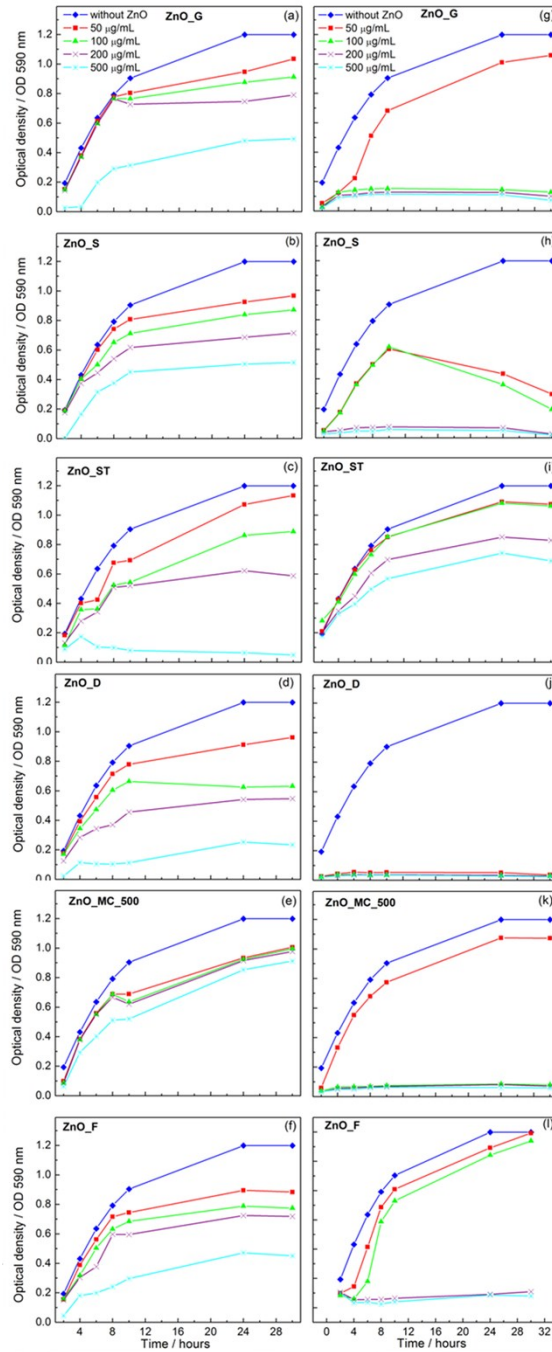

**Figure 3.** Temporal grow curves of *P. aeruginosa* (a - f) and *B. subtilis* (g - l) in the presence of different concentrations of ZnO\_SAC composites.
